1 *ddcP*, *pstB*, and excess D-lactate impact synergism between vancomycin and chlorhexidine  
2 against *Enterococcus faecium* 1,231,410

3

4 Pooja Bhardwaj<sup>a</sup>, Moutusee Z. Islam<sup>a</sup>, Christi Kim, Uyen Thy Nguyen, and Kelli L. Palmer<sup>a\*</sup>

5

6 <sup>a</sup>Department of Biological Sciences, University of Texas at Dallas, Richardson, Texas 75080

7

8

9

10

11

12

13 Running title: Vancomycin and chlorhexidine synergism in VRE

14

15

16 \*Contact information for corresponding author:

17

18 Kelli Palmer: [kelli.palmer@utdallas.edu](mailto:kelli.palmer@utdallas.edu)

19

20

21

22

23

24

25

26

27 **Abstract**

28

29 Vancomycin-resistant enterococci (VRE) are important nosocomial pathogens that cause life-  
30 threatening infections. To control hospital-associated infections, skin antisepsis and bathing  
31 utilizing chlorhexidine is recommended for VRE patients in acute care hospitals. Previously, we  
32 reported that exposure to inhibitory chlorhexidine levels induced the expression of vancomycin  
33 resistance genes in VanA-type *Enterococcus faecium*. However, vancomycin susceptibility  
34 actually increased for VanA-type *E. faecium* in the presence of chlorhexidine. Hence, a  
35 synergistic effect of the two antimicrobials was observed. In this study, we used multiple  
36 approaches to investigate the mechanism of synergism between chlorhexidine and vancomycin  
37 in the VanA-type VRE strain *E. faecium* 1,231,410. We generated clean deletions of 7 of 11  
38 *pbp*, transpeptidase, and carboxypeptidase genes in this strain (*ponA*, *pbpF*, *pbpZ*, *pbpA*, *ddcP*,  
39 *ldt<sub>fm</sub>*, and *vanY*). Deletion of *ddcP*, encoding a membrane-bound carboxypeptidase, altered the  
40 synergism phenotype. Furthermore, using *in vitro* evolution, we isolated a spontaneous synergy  
41 escaper mutant and utilized whole genome sequencing to determine that a mutation in *pstB*,  
42 encoding an ATPase of phosphate-specific transporters, also altered synergism. Finally,  
43 addition of excess D-lactate, but not D-alanine, enhanced synergism. Overall, our work  
44 identified factors that alter chlorhexidine-induced vancomycin resensitization in a model VanA-  
45 type VRE strain.

46

47

48

49

50

51

52

## 53 Introduction

54

55 *Enterococcus faecium* are Gram-positive commensal bacteria inhabiting the gastrointestinal  
56 tracts of humans and animals (1). The ability to survive in harsh environmental conditions  
57 including starvation and desiccation facilitated the emergence of hospital-adapted strains which  
58 are resistant to the action of antibiotics and disinfectants (2). Hospital-adapted enterococcal  
59 strains have limited treatment options and are typically characterized by high-level resistance to  
60 vancomycin, a glycopeptide antibiotic which inhibits the process of peptidoglycan synthesis (3,  
61 4). Vancomycin-resistant enterococci (VRE) synthesize peptidoglycan precursors for which  
62 vancomycin has low affinity (5-8). Vancomycin resistance in hospital-adapted enterococcal  
63 isolates occurs through the horizontal acquisition of resistance genes (9, 10). For VanA-type  
64 VRE, vancomycin resistance is conferred and controlled by the activities encoded by the  
65 *vanRS*, *vanHAX*, and *vanYZ* genes.

66

67 Patients in critical care units are frequently bathed or cleansed with chlorhexidine, a cationic cell  
68 membrane-targeting antimicrobial, to reduce the occurrence of hospital-associated infections  
69 (11-13). Chlorhexidine interacts with the negatively charged phospholipids and proteins on the  
70 cell membrane after primary adsorption by the cell (14, 15). Low chlorhexidine levels disrupt the  
71 membrane potential and integrity whereas high chlorhexidine levels can cause a complete  
72 precipitation of the cytoplasm (16-18). We previously analyzed the transcriptome of the VanA-  
73 type vancomycin-resistant strain *E. faecium* 1,231,410 exposed to inhibitory levels of  
74 chlorhexidine, and we found that chlorhexidine stress induced the expression of the VanA-type  
75 vancomycin resistance genes (19). However, vancomycin MIC actually decreased when  
76 chlorhexidine was present in broth microdilution assays (19).

77

78 We previously proposed three models to explain chlorhexidine-induced vancomycin

79 sensitization despite transcriptional activation of VanA-type vancomycin resistance genes by  
80 chlorhexidine (19). Vancomycin resistance genes code for the synthesis of alternative  
81 peptidoglycan precursors that terminate in D-alanine-D-lactate (D-Ala-D-Lac), for which  
82 vancomycin has lower affinity compared to the normal D-alanine-D-alanine (D-Ala-D-Ala).  
83 Model 1 is that altered penicillin-binding protein (Pbp) levels in the presence of chlorhexidine  
84 prevents D-Ala-D-Lac precursors from being cross-linked. Model 2 proposes that chlorhexidine  
85 alters substrate pools for peptidoglycan synthesis, resulting in vancomycin-sensitive termini that  
86 are neither D-Ala-D-Ala nor D-Ala-D-Lac. Model 3 is that post-translational regulation of VanX  
87 and/or VanY prevents depletion of D-Ala-D-Ala termini from peptidoglycan precursors in the  
88 presence of chlorhexidine. In this study, we used targeted gene deletions, *in vitro* evolution, and  
89 culture assays in modified media to assess specific features of these models. Overall, we  
90 identify two genes, *ddcP* and *pstB*, and one growth condition (excess D-lactate), that alter  
91 chlorhexidine-induced vancomycin sensitization in the model VanA-type VRE strain *E. faecium*  
92 1,231,410.

93

## 94 **Materials and Methods**

95

96 **Bacterial strains and growth conditions.** Bacterial strains used in this study are shown in  
97 Table 1. *E. faecium* was cultured at 37°C on brain heart infusion (BHI) agar or in broth without  
98 agitation unless otherwise stated. *Escherichia coli* was cultured at 37°C in lysogeny broth (LB)  
99 broth with shaking at 225 rpm or on LB with 1.5% agar unless otherwise stated. The  
100 chlorhexidine product used for all experiments was Hibiclens (4% wt/vol chlorhexidine gluconate  
101 with 4% isopropyl alcohol). We refer to Hibiclens as H-CHG in this study. Antibiotics were added  
102 at the following concentrations: vancomycin, 50 µg/ml for *E. faecium*, and chloramphenicol, 15  
103 µg/ml for *E. coli*.

104

105 **Table 1. Bacterial strains and plasmids used in the study.**

| <b>Strain or plasmid</b>    | <b>Description</b>                                                                                                                                                                                           | <b>Reference</b> |
|-----------------------------|--------------------------------------------------------------------------------------------------------------------------------------------------------------------------------------------------------------|------------------|
| <b>Bacterial strains</b>    |                                                                                                                                                                                                              |                  |
| <i>E. faecium</i> 1,231,410 | Clade A clinical isolate from skin and soft tissue infection; VanA-type VRE                                                                                                                                  | (20)             |
| PB411                       | <i>E. faecium</i> 1,231,410 $\Delta$ <i>pbpF</i> (EFTG_02258)                                                                                                                                                | This study       |
| PB412                       | <i>E. faecium</i> 1,231,410 $\Delta$ <i>ddcP</i> (EFTG_01253)                                                                                                                                                | This study       |
| PB413                       | <i>E. faecium</i> 1,231,410 $\Delta$ <i>vanY</i> (EFTG_02039)                                                                                                                                                | This study       |
| PB414                       | <i>E. faecium</i> 1,231,410 $\Delta$ <i>ldtfm</i> (EFTG_02461)                                                                                                                                               | This study       |
| PB416                       | <i>E. faecium</i> 1,231,410 $\Delta$ <i>ponA</i> (EFTG_00370)                                                                                                                                                | This study       |
| PB417                       | <i>E. faecium</i> 1,231,410 $\Delta$ <i>pbpZ</i> (EFTG_01189)                                                                                                                                                | This study       |
| PB418                       | <i>E. faecium</i> 1,231,410 $\Delta$ <i>ddcP</i> $\Delta$ <i>vanY</i>                                                                                                                                        | This study       |
| PB419                       | <i>E. faecium</i> 1,231,410 $\Delta$ <i>pbpA</i> (EFTG_02132); marked deletion with <i>tetL</i>                                                                                                              | This study       |
| MI111                       | <i>E. faecium</i> PB412 with reconstituted <i>ddcP</i>                                                                                                                                                       | This study       |
| MI112                       | <i>E. faecium</i> 1,231,410 $\Delta$ <i>ddcP</i> $\Delta$ <i>ldtfm</i>                                                                                                                                       | This study       |
| SE101                       | Synergy escaper mutant; has Ser199Leu substitution in EFTG_01173                                                                                                                                             | This study       |
| PB430                       | <i>E. faecium</i> 410 $\Delta$ <i>pst</i> transporter (EFTG_01170-74)                                                                                                                                        | This study       |
| PB431                       | SE101 $\Delta$ <i>pst</i> transporter (EFTG_01170-74)                                                                                                                                                        | This study       |
| <b>Plasmids</b>             |                                                                                                                                                                                                              |                  |
| pHA101                      | Markerless, counterselectable exchange plasmid; confers chloramphenicol resistance (Cam <sup>R</sup> )                                                                                                       | (19)             |
| pPB401                      | pHA101 containing a 2.028-kb EcoRI/EcoRI-digested fragment flanking upstream and downstream of <i>E. faecium</i> 410 <i>pbpF</i> (EFTG_02258), Cam <sup>R</sup>                                              | This study       |
| pPB402                      | pHA101 containing a 2.019-kb EcoRI/EcoRI-digested fragment flanking upstream and downstream of fragment flanking upstream and downstream of <i>E. faecium</i> 410 <i>ddcP</i> (EFTG_01253), Cam <sup>R</sup> | This study       |
| pPB403                      | pHA101 containing a 2.010-kb EcoRI/EcoRI-digested fragment flanking upstream and downstream of <i>E. faecium</i> 410 <i>vanY</i> (EFTG_02039), Cam <sup>R</sup>                                              | This study       |
| pPB404                      | pHA101 containing a 2.010-kb EcoRI/EcoRI-digested fragment flanking upstream and downstream of <i>E. faecium</i> 410 <i>ldtfm</i> (EFTG_02461), Cam <sup>R</sup>                                             | This study       |
| pPB406                      | pHA101 containing a 2.028-kb EcoRI/EcoRI-digested fragment flanking upstream and downstream of <i>E. faecium</i> 410 <i>ponA</i> (EFTG_00370), Cam <sup>R</sup>                                              | This study       |
| pPB407                      | pHA101 containing a 2.028-kb EcoRI/EcoRI-digested fragment flanking upstream and downstream of <i>E. faecium</i> 410 <i>pbpZ</i> (EFTG_01189), Cam <sup>R</sup>                                              | This study       |
| pPB408                      | pHA101 containing a 4.317-kb fragment containing                                                                                                                                                             | This study       |

|        |                                                                                                                                                                                |            |
|--------|--------------------------------------------------------------------------------------------------------------------------------------------------------------------------------|------------|
|        | flanking upstream, tetracycline resistance gene ( <i>tetL</i> ), downstream arms of <i>E. faecium</i> 410 <i>pbpA</i> EFTG_02132, confers tetracycline antibiotic resistance   |            |
| pMI101 | pHA101 containing a 3.303-kb EcoRI/EcoRI-digested fragment flanking upstream and downstream arms with <i>ddcP</i> gene (EFTG_01253), Cam <sup>R</sup>                          | This study |
| pPB411 | pHA101 containing a 2.028-kb EcoRI/EcoRI-digested fragment flanking upstream and downstream of <i>E. faecium</i> 410 <i>pst</i> transporters (EFTG_01170-74), Cam <sup>R</sup> | This study |

106

107

108 **Routine molecular biology techniques.** *E. faecium* genomic DNA (gDNA) was isolated using  
109 a previously published protocol (21). Electroporation of *E. faecium* was performed as described  
110 previously (19). Plasmids were purified using the GeneJET Miniprep kit (Thermo Scientific).  
111 DNA fragments were purified using the Purelink PCR purification kit (Invitrogen). *Taq*  
112 polymerase (New England Biolabs; NEB) was used for routine PCR reactions. Phusion  
113 polymerase (Fisher) was used for cloning applications. Restriction endonucleases (NEB) and T4  
114 DNA ligase (NEB) reactions were performed per the manufacturer's instructions. Routine DNA  
115 sequencing was performed by the Massachusetts General Hospital DNA core facility (Boston,  
116 MA). All genetic constructs were validated by DNA sequencing. Primers used in this study are  
117 shown in Table S1.

118

119 **MIC determinations.** The minimum inhibitory concentration (MIC) was defined as the lowest  
120 drug concentration at which the OD<sub>600nm</sub> of the bacterial culture matched the OD<sub>600nm</sub> of the  
121 negative control (uninoculated BHI broth). For this study, we refer to synergy MIC as the  
122 vancomycin MIC of enterococci in BHI supplemented with H-CHG. The synergy MIC was  
123 determined by slightly modifying our previously published protocol (19). 5 µl of vancomycin  
124 stock solution (40 mg/ml in water) was added to 195 µl of BHI supplemented with H-CHG in the  
125 first well of a 96-well microtiter plate. Next, 100 µl was transferred to the next well containing

126 100  $\mu$ l of BHI supplemented with H-CHG to make two-fold serial dilutions of vancomycin drug.  
127 Overnight cultures of *E. faecium* were diluted to OD<sub>600</sub> of 0.01 in fresh BHI, and 5  $\mu$ l of the  
128 diluted culture was used to inoculate the wells of the plate. The OD<sub>600</sub> of the cultures was  
129 measured after 24 h incubation at 37°C. For determining synergy MIC in the presence of D-  
130 lactate or D-alanine, D-lactate or D-alanine were solubilized to a final concentration of 0.2 M in  
131 BHI and the solutions were filter sterilized. Two-fold serial dilutions of vancomycin were made in  
132 BHI supplemented with D-lactate/D-alanine and H-CHG as described above. Fold decrease was  
133 calculated by dividing the vancomycin MIC in the absence of H-CHG by the vancomycin MIC in  
134 the presence of the highest H-CHG concentration at which visible growth was observed. Each  
135 experiment was performed independently at least three times.

136

137 **Deletion of genes in *E. faecium*.** Genes were deleted in-frame utilizing plasmid pHA101 as  
138 described previously (19). Briefly, ~1 kb regions upstream and downstream of the target gene  
139 were amplified and ligated to pHA101. The sequence of the deletion construct plasmid was  
140 verified by Sanger sequencing and introduced into *E. faecium* by electroporation. Temperature  
141 shifting at the non-permissible temperature of 42°C and counter-selection with *p*-  
142 chlorophenylalanine was followed according to a previously published protocol (22).  
143 Presumptive deletion mutants were confirmed by Sanger sequencing of the region of interest  
144 followed by Illumina genome sequencing (see below).

145

146 After several unsuccessful attempts to generate an unmarked deletion of *pbpA* in *E. faecium*  
147 1,231,410, we introduced a tetracycline resistance marker (*tetL*) between the flanking upstream  
148 and downstream arms of the deletion construct to select for deletion mutants. Briefly, *tetL* was  
149 amplified from pLT06-*tet* using primers *tetL* For and Rev. The deletion construct was linearized  
150 via PCR using Phusion DNA polymerase (Fisher) and primers *pbpA*-linear For and Rev (Table  
151 S1). The linearized PCR product was dephosphorylated using Shrimp Alkaline phosphatase

152 (New England Biolabs) per the manufacturer's instructions and then ligated with *tetL* to generate  
153 the deletion construct PB408. The deletion construct was propagated in EC1000 and  
154 sequenced using Sanger sequencing prior to transformation into *E. faecium* 1,231,410.

155

156 **Complementation of *ddcP* deletion.** The *ddcP* gene was restored to the chromosome of the  
157 *E. faecium* 1,231,410 *ddcP* deletion mutant. The *ddcP* gene and ~1 kb regions up- and  
158 downstream were amplified from *E. faecium* 1,231,410 wild-type gDNA, and the amplicon was  
159 digested and inserted into pHA101. The knock-in plasmid construct (pMI101) was transformed  
160 into the *ddcP* deletion mutant by electroporation. The temperature shifting and counter-selection  
161 protocol was followed as described previously (22). The chromosomal integration of the gene  
162 was confirmed by Sanger sequencing.

163

164 **Growth kinetics of *E. faecium* in the presence of H-CHG and vancomycin.** Overnight  
165 cultures of *E. faecium* were diluted to an OD<sub>600</sub> of 0.01 in fresh, pre-warmed BHI and incubated  
166 at 37°C with shaking at 100 rpm. The cultures were grown until OD<sub>600</sub> reached 0.5 to 0.6.  
167 Twenty-five milliliters of the culture were added to equal amounts of pre-warmed BHI containing  
168 vancomycin (50 µg/ml) and/or H-CHG (4.9 µg/ml), or only BHI (control). OD<sub>600</sub> values were then  
169 monitored hourly for 6 h, and an OD<sub>600</sub> reading was taken at the 24 h time point. For some  
170 experiments and timepoints, CFU/mL were additionally determined by serial dilution of culture  
171 and plating on BHI agar. Growth curves were repeated independently three times. For  
172 assessing synergy between vancomycin and glycine, the same experimental design was used,  
173 except that H-CHG was replaced with 0.2 M glycine.

174

175 **Isolation of *E. faecium* 1,231,410 synergy escaper mutant.** An *E. faecium* 1,231,410 wild-  
176 type culture treated with vancomycin and H-CHG was incubated for 24 h, when turbidity was  
177 observed. The recovered culture was used as an inoculum for a second growth curve



178 experiment with vancomycin and H-CHG. OD<sub>600</sub> values were monitored for 6 h, and at the end  
179 of 6 h, the cultures were cryopreserved at -80°C. The stocked populations were struck on BHI  
180 agar, and the synergy MIC was determined for well-isolated colonies using the broth  
181 microdilution assay described above. Colonies with elevated synergy MIC as compared to the  
182 parental *E. faecium* 1,231,410 strain were passaged three times in BHI broth and the synergy  
183 MICs determined again. A strain with a stably elevated synergy MIC was isolated; this strain is  
184 referred to as SE101.

185

186 **Genome sequencing and analysis.** SE101 gDNA was isolated according to a previously  
187 published protocol (21) and sequenced with Illumina technology at Molecular Research LP  
188 (Shallowater, Texas). Paired end, 2x150 reads were obtained. For the analyses, sequence  
189 reads were assembled locally to the *E. faecium* 1,231,410 draft reference genome (GenBank  
190 accession number NZ\_ACBA00000000.1) using default parameters in CLC Genomics  
191 Workbench (Qiagen). Polymorphisms in the resequencing assemblies were detected using  
192 basic variant mapping using default settings with a minimum variant frequency of 50%. To  
193 detect transposon/IS element hopping, the assembly parameters were changed to global  
194 instead of local alignment, and regions with sequential polymorphisms were manually analyzed  
195 for potential transposon/IS element hopping. Sanger sequencing was utilized to confirm  
196 polymorphisms.

197

198 To confirm deletion mutants, gDNA was isolated as above and sequenced with Illumina  
199 technology at the UT-Dallas Genome Core (for deletion mutants  $\Delta pbpF$ ,  $\Delta ddcP$ ,  $\Delta vanY$ ,  $\Delta ldtfm$ ,  
200  $\Delta ponA$ ,  $\Delta ddcP \Delta vanY$ ,  $\Delta ddcP \Delta ldtfm$ , and the  $\Delta pbpA$  marked deletion with *tetL*) or the Microbial  
201 Genome Sequencing Center in Pittsburgh, PA (for the  $\Delta pbpZ$  mutant). Paired end, 2x75 reads  
202 and 2x150 reads were obtained, respectively. For the analyses, sequence reads were  
203 assembled locally to the *E. faecium* 1,231,410 draft reference genome as above. Average

204 coverage of the reference genome ranged from 88-245X across all mutants analyzed. The  
205 absence of the gene of interest was confirmed for each presumptive deletion mutant by  
206 manually analyzing the read assembly at the location of the gene.

207

208 **Phosphate levels measurement.** A commercially available kit (Sigma MAK030) and previously  
209 published protocol (23, 24) was utilized to measure intracellular inorganic phosphate (P<sub>i</sub>) levels  
210 at five time points (OD<sub>600</sub> from 0.4-0.5, 0.6-0.7, 0.7-0.8, 0.8-0.9, 1.0-1.5) from *E. faecium*  
211 1,231,410 and SE101 cultures. The phosphate levels were normalized by CFU and five  
212 independent trials were performed.

213

214 **Accession number.** Raw Illumina sequencing reads generated in this study are available in the  
215 Sequence Read Archive under the accession numbers SRP113791 (for strain SE101) and  
216 PRJNA657813 (for confirmation of deletion mutants).

217

## 218 **Results and Discussion**

219

220 **Addition of D-lactate enhances chlorhexidine-induced vancomycin sensitization.** It was  
221 previously observed that culture supplementation with 0.2 M of glycine or select D-amino acids  
222 (including D-methionine, D-serine, D-alanine, or D-phenylalanine) increased VRE susceptibility  
223 to vancomycin (25). Consistent with this, Aart et al reported that excess D-Ala substrate  
224 competes with D-Lac, thereby increasing the ratio of cell wall termini ending at D-Ala and the  
225 efficacy of vancomycin against *Streptomyces* and *E. faecium* (26). We reasoned that if H-CHG  
226 stress resulted in an alteration of substrate pools and therefore vancomycin-sensitive termini  
227 that are neither D-Ala-D-Ala nor D-Ala-D-Lac (Model 2), an excess of D-lactate could compete  
228 with this alternative pathway, thereby increasing the number of D-Ala-D-Lac termini and  
229 resulting in loss of synergism between vancomycin and H-CHG.

230

231 To test this, synergy assays were performed with *E. faecium* 1,231,410 in the presence of 0.2 M  
232 D-lactate or D-alanine (Table 2). Addition of D-lactate to BHI broth lacking H-CHG resulted in a  
233 4-fold increase in vancomycin MIC (Table 2), demonstrating that excess D-lactate does result in  
234 reduced vancomycin susceptibility. However, and counter to our expectations, in the presence  
235 of both D-lactate and H-CHG, the H-CHG-induced vancomycin resensitization phenotype was  
236 enhanced (Table 2). This result suggests that the synergism phenotype is dependent upon D-  
237 Ala-D-Lac termini and is enhanced by increased abundance of D-Ala-D-Lac termini. As  
238 expected based on the results of Aart et al (26), vancomycin MIC decreased in the presence of  
239 D-alanine, and we observed only a 2-fold additional MIC decrease in the presence of both D-  
240 alanine and H-CHG (Table 2).

241

242 **Table 2. Median vancomycin MICs in *E. faecium* 1,231,410.**

| H-CHG ( $\mu\text{g/ml}$ ) <sup>b</sup> | Vancomycin MIC ( $\mu\text{g/ml}$ ) <sup>a</sup> |                       |                       |
|-----------------------------------------|--------------------------------------------------|-----------------------|-----------------------|
|                                         | BHI                                              | BHI + 0.2 M D-Lactate | BHI + 0.2 M D-Alanine |
| 0                                       | 250                                              | 1000                  | 7.8                   |
| 1.2                                     | 62.5                                             | 1.0                   | 3.9                   |
| 2.4                                     | 0.2                                              | No growth             | No growth             |
| 4.9                                     | No growth                                        | No growth             | No growth             |

243

244 <sup>a</sup>Vancomycin MICs ( $\mu\text{g/ml}$ ) at 24 h post-inoculation from at least three independent  
245 experiments.

246 <sup>b</sup>4.9 µg/ml H-CHG is the MIC for *E. faecium* 1,231,410; 1.2 µg/ml H-CHG and 2.4 µg/ml H-CHG  
247 are 1/4X MIC and 1/2X MIC, respectively.

248

249

250 **Deletion of *ddcP* alters the synergism phenotype.** The enterococcal cell wall is a multi-  
251 layered network and is characterized by the presence of peptidoglycan, teichoic acid, and  
252 polysaccharides (27, 28). The main component of the cell wall is peptidoglycan, which is a  
253 mesh-like structure consisting of parallel glycan chains cross-linked by amino acids (27). The  
254 glycan chains consist of two alternating amino sugars, N-acetylglucosamine (GlcNAc) and N-  
255 acetylmuramic acid (MurNAc), connected by β-1,4 linkages (29-31). In *E. faecium*, each  
256 MurNAc sugar is linked to short stem pentapeptides (L-alanine<sup>1</sup>-D-isoglutamic acid<sup>2</sup>-L-lysine<sup>3</sup>-D-  
257 alanine<sup>4</sup>-D-alanine<sup>5</sup>), which alternate between L- and D-amino acids (30, 32). The MurNAc and  
258 GlcNAc glycan sugars are synthesized as a UDP (Uridine diphosphate) derivative in a step-wise  
259 fashion in the cytosol (33). Next, MurNAc sugars containing short peptides are transferred to a  
260 lipid carrier Lipid I (C<sub>55</sub>-undecaprenol) (34, 35) and added to UDP-derivative GlcNAc to build a  
261 disaccharide, GlcNAc-MurNAc-pentapeptide-C<sub>55</sub> pyrophosphate, also known as Lipid II (33, 34).  
262 Lipid II units are translocated from the cytosol to the outer side of the cell membrane (36) and  
263 polymerized through an ordered rate of two processes, transglycosylation (condensation of  
264 linear glycan chains) and transpeptidation (cross-linking between carboxyl group of one  
265 pentapeptide and amino acid of an adjacent pentapeptide). The disaccharide units are  
266 integrated into the growing peptidoglycan layers to form the cell wall (37, 38) and the lipid carrier  
267 is recycled back into the cytosol.

268

269 Two classes of penicillin-binding proteins (Pbps) mediate the transpeptidation process (39-41).  
270 Class A Pbps (encoded by *ponA*, *pbpF*, and *pbpZ*) are bifunctional, multimodular, high-  
271 molecular mass proteins, and catalyze both transpeptidation and transglycosylation reactions.

272 Class B Pbps (encoded by *pbpB*, *pbpA*, and *pbp5*) are monofunctional, low-molecular mass  
273 proteins, and catalyze only transpeptidation reactions. Class A and B Pbps mediate 4,3 cross-  
274 links (D,D-transpeptidation) between cell wall precursors and these cross-links constitute the  
275 majority of the mature cell wall (38). However, 3,3 cross-links are also present in the  
276 enterococcal cell wall. The combined activities of DdcP or DdcY (D,D-carboxypeptidase) and  
277 the L,D transpeptidase Ldt<sub>fm</sub> can bypass conventional D,D-transpeptidation and mediate 3,3  
278 cross-linking (42-44). DdcP and/or DdcY generates tetrapeptides and reduces the availability of  
279 pentapeptide precursors by trimming the terminal D-Ala. Next, Ldt<sub>fm</sub> mediates cross-links  
280 between these cell wall termini.

281  
282 To determine whether these factors contribute to vancomycin-chlorhexidine synergism against  
283 VRE (Model 1), we deleted 6 of 9 of these genes in *E. faecium* 1,231,410 (Table 1). Our  
284 presumptive *pbpB*, *pbp5*, and *ddcY* deletion mutants could not be confirmed by genome  
285 sequencing. We utilized growth curves to assess phenotypes of the deletion mutants in the  
286 presence and absence of vancomycin and H-CHG. For these experiments, vancomycin (50  
287 µg/ml) and H-CHG (4.9 µg/ml) were added to exponentially growing *E. faecium* cultures; a no-  
288 drug control was also performed. As shown in Fig. 1A, the OD<sub>600</sub> of *E. faecium* 1,231,410 wild-  
289 type cultures decreased after addition of vancomycin and H-CHG, consistent with cell lysis.  
290 After 24 h, the cultures treated with vancomycin and H-CHG were visibly turbid, indicating that  
291 *E. faecium* can recover from the effects of the antimicrobials in this experimental condition.

292  
293  
294 **Figure 1. A  $\Delta ddcP$  mutant has an altered vancomycin/H-CHG synergy phenotype.** Optical  
295 density (OD<sub>600nm</sub>) of (A) *E. faecium* 1,231,410 wild-type (*E. faecium* 410), (B) the *ddcP* deletion  
296 mutant, and (C) the *ddcP* complemented strain with and without vancomycin and H-CHG  
297 treatment. *E. faecium* was cultured in BHI broth until the OD<sub>600</sub> reached 0.6, as described in

298 materials and methods. Equal volumes of cultures were split into BHI (control; red circles) or  
299 BHI containing vancomycin (50  $\mu\text{g/ml}$ ) and H-CHG (4.9  $\mu\text{g/ml}$ ) (blue squares).  $\text{OD}_{600}$  values  
300 were monitored for 6 h. Error bars indicate standard deviations from  $n=3$  independent  
301 experiments. Significance was assessed using the one-tailed Student's  $t$ -test. \* denotes  $P$ -value  
302  $< 0.05$ . Stars indicate significant differences between vancomycin- and H-CHG-treated cultures  
303 in panel B versus A, and in panel C versus B. Note that growth curve of *E. faecium* 410 wild-  
304 type in the presence of vancomycin and chlorhexidine from Fig. 1A has been shown again in  
305 Fig. S1A for comparison with the *pbp* deletion mutants.

306

307

308 The growth phenotypes of the  $\Delta pbpF$ ,  $\Delta ponA$ ,  $\Delta pbpZ$ ,  $\Delta pbpA$ , and  $\Delta dtm$  deletion mutants, as  
309 measured by  $\text{OD}_{600}$  values, were comparable to the parental strain (Fig. S1). The  $\Delta ddcP$  mutant  
310 had a different phenotype from the wild-type strain (Fig. 1B). After treatment with vancomycin  
311 and H-CHG, the  $\text{OD}_{600}$  values for the *ddcP* deletion mutant did not decrease. The  $\text{OD}_{600}$  values  
312 were significantly different between the wild-type and the  $\Delta ddcP$  mutant for all time points post-  
313 H-CHG and vancomycin addition ( $P$ -value  $< 0.05$ , one-tailed Student's  $t$  test). The  $\Delta ddcP$   
314 mutant was complemented by restoration of the *ddcP* gene in *cis*.  $\text{OD}_{600}$  values of the  
315 complemented strain in the presence of vancomycin and H-CHG were similar to the wild-type  
316 (Fig. 1C). No statistically significant differences in  $\text{OD}_{600}$  values were observed between the  
317 wild-type and the *ddcP* complemented strain in the presence of vancomycin and H-CHG.

318

319 In separate experiments, we assessed both the  $\text{OD}_{600}$  and viability of wild-type and  $\Delta ddcP$   
320 cultures for 3 hours post-treatment with vancomycin and H-CHG. Optical density values  
321 significantly differed between the two strains post-treatment; however, CFU/mL values did not  
322 (Fig. S2). These results suggest that *ddcP* deletion does not alter the mechanism by which  
323 vancomycin/H-CHG kills *E. faecium*, but rather whether the dead cells lyse.

324

325 **The  $\Delta ddcP$  mutant has altered susceptibility to vancomycin-glycine synergy.** Synergism  
326 between glycine and vancomycin was previously reported for VRE (25). We carried out growth  
327 curves in the presence of vancomycin (50  $\mu\text{g/ml}$ ) and 0.2 M glycine. A lytic effect was observed  
328 for the wild-type strain cultured with vancomycin and glycine, with the most pronounced effect  
329 observed at the 24 h time point (Fig. 2A). However, this lytic effect was not observed for the  
330  $\Delta ddcP$  mutant ( $P$ -value < 0.05, assessed by one-tailed Student's  $t$ -test) (Fig. 2B). Together with  
331 our results in Figure 1 and Figure S2, these results indicate that DdcP activity weakens the cell  
332 wall under antimicrobial stress by reducing the availability of cell wall pentapeptide precursors,  
333 contributing to cell lysis. This suggests that  $ddcP$  expression in cells in the presence of CHX and  
334 vancomycin antimicrobials contributes to increased cell lysis and synergism between the two  
335 antimicrobials.

336

337

338 **Figure 2. A  $\Delta ddcP$  mutant has reduced susceptibility to vancomycin/glycine synergy.** (A)  
339 *E. faecium* 410 wild-type and (B)  $ddcP$  deletion mutant cultures were grown at 37°C in BHI until  
340  $\text{OD}_{600}$  reached 0.6 as described in materials and methods. Equal volumes of cultures were split  
341 into BHI (control; red circles) or BHI containing vancomycin (50  $\mu\text{g/ml}$ ) and glycine (0.2 M)  
342 (green squares).  $\text{OD}_{600}$  values were monitored for 6 h and a reading at 24 h was recorded. Error  
343 bars indicate standard deviations from  $n=3$  independent experiments. Significance was  
344 assessed using the one-tailed Student's  $t$ -test. \* denotes  $P$ -value < 0.05. Stars indicate  
345 significant differences between vancomycin- and glycine-treated cultures in panel B versus A.

346

347

348 **A  $vanY_A$  mutant does not have an altered synergy phenotype.** Previously, Kristich et al  
349 investigated the genetic basis of synergism between vancomycin and cephalosporins (a class of

350  $\beta$ -lactam antibiotics) in the VanB-type VRE strain *E. faecalis* V583 (45). The synergism was  
351 mediated by VanY<sub>B</sub>, a carboxypeptidase that reduces the availability of precursors ending at D-  
352 Ala-D-Ala by trimming the terminal D-Ala, thereby eliminating the target of vancomycin. In the  
353 absence of *vanY<sub>B</sub>*, cross-linking of cell wall precursors was mediated by low-affinity Pbps and  
354 synergism between vancomycin and cephalosporins was lost (45). To determine whether *vanY<sub>A</sub>*  
355 contributed to vancomycin-chlorhexidine synergism against VRE, which is a component of our  
356 Model 3, we deleted *vanY<sub>A</sub>* in *E. faecium* 1,231,410. We observed no effect on the synergy  
357 phenotype as assessed by OD<sub>600</sub> values (Fig. S1C). Moreover, deletion of *ddcP* in a  $\Delta$ *vanY*  
358 background did not further enhance the phenotype of a  $\Delta$ *ddcP* mutant (Fig. S2E).

359

360 ***E. faecium* 1,231,410 can escape from vancomycin-chlorhexidine synergy.** We observed  
361 the growth kinetics of *E. faecium* 1,231,410 cultures exposed to no, either, or both 50  $\mu$ g/ml  
362 vancomycin and 4.9  $\mu$ g/ml H-CHG over a two-day growth curve experiment. As shown in Fig.  
363 3A, cultures exposed to vancomycin were growth-inhibited for the first 2.5 h after exposure, and  
364 after 2.5 h, OD<sub>600</sub> began to increase, consistent with the induction of vancomycin resistance  
365 genes and synthesis of modified cell walls, as previously observed (46, 47). The cultures  
366 exposed to H-CHG were also temporarily growth-inhibited. Consistent with the experiments  
367 shown in Fig. 1A, the OD<sub>600</sub> of cultures exposed to both vancomycin and H-CHG declined, and  
368 after 24 h, the cultures recovered.

369

370

371 **Figure 3. *E. faecium* 1,231,410 can adapt to vancomycin/H-CHG synergy.** The growth  
372 kinetics of *E. faecium* 410 in the presence of vancomycin and H-CHG were observed over a  
373 two-day (40 h) growth curve. Panel (A) Representative OD<sub>600</sub> of *E. faecium* 410 after treatment  
374 with 0X (control; red circles), vancomycin (orange squares), H-CHG (green triangles) or  
375 vancomycin and H-CHG (inverted blue triangles). *E. faecium* culture was grown at 37°C in BHI



376 until OD<sub>600</sub> reached 0.6 and equal volumes of cultures were split into BHI with different  
377 antimicrobials (shown by arrow) as described in materials and methods. OD<sub>600</sub> values were  
378 monitored for 6 h and after 24 h, the vancomycin and H-CHG-treated recovered culture (circled  
379 and indicated with dashed arrow) was used as an inoculum to repeat the growth curve (shown  
380 in panel B).

381

382

383 The next day, the recovered culture (from the vancomycin + H-CHG growth curve) was used as  
384 inoculum to repeat the growth curve experiment (Fig. 3B). Interestingly, the growth inhibition  
385 phenotypes observed for the first growth curve experiment were not observed in this second  
386 passage. Most strikingly, cell lysis was no longer observed for the vancomycin- and  
387 chlorhexidine-treated culture. This is an important observation since it indicates that synergy  
388 mutant(s) that do not lyse in the presence of vancomycin and H-CHG can readily emerge.

389

390 **A synergy escape mutant has a mutation in *pstB*.** We colony-purified a synergy escaper  
391 mutant (SE101) from the second growth curve cycle, as described in the materials and  
392 methods. The growth kinetics of SE101 in the presence of vancomycin and H-CHG confirmed  
393 that the synergism phenotype is altered in this strain (Fig. 4A and B). SE101 was initially  
394 growth-inhibited in the presence of vancomycin and H-CHG, but after 3 h, OD<sub>600</sub> values began  
395 to increase, unlike what is observed for the wild-type. Significant differences in OD<sub>600</sub> values  
396 were observed for SE101 compared to the wild-type for time points 3 h after addition of  
397 vancomycin and H-CHG (*P*-value < 0.05 using one-tailed Student's *t* test).

398

399

400 **Figure 4. Mutations in the phosphate-specific transport (*pst*) operon result in escape**  
401 **from vancomycin-H-CHG synergy.** Growth of (A) *E. faecium* 410 wild-type, (B) SE101, (C) *E.*

402 *faecium* 410 $\Delta$ *pst*, and (D) SE101 $\Delta$ *pst*. *E. faecium* was cultured in BHI until the OD<sub>600</sub> reached  
403 0.6. Equal volumes of cultures were split into BHI (control; red circles) or BHI containing  
404 vancomycin (50  $\mu$ g/ml) and H-CHG (4.9  $\mu$ g/ml) (blue squares). OD<sub>600</sub> values were monitored for  
405 6 h and the 24 h time point was recorded. Error bars indicate standard deviations from n=3  
406 independent experiments. Significance was assessed using the one-tailed Student's *t*-test. \*  
407 denotes *P*-value < 0.05. Stars indicate significant differences between vancomycin- and H-  
408 CHG-treated cultures in panel B versus A, in panel C versus A, and in panel D versus B.

409

410

411 Utilizing whole genome sequencing, we identified a mutation conferring a S199L substitution in  
412 PstB (EFTG\_01173) in SE101. As a result of this substitution, the protein is predicted to fold into  
413 a beta-strand instead of a coil (48). The *pst* (phosphate-specific transport) operon has been well  
414 characterized in *E. coli* and consists of *pstSCAB* and *phoU* (a regulator). In phosphate-  
415 starvation conditions, inorganic phosphate (Pi) binds PstS and is released into the cytoplasm by  
416 the inner membrane channel formed by PstA-PstC. PstB energizes this channel by hydrolyzing  
417 ATP (49). The *pst* system and antimicrobial susceptibility has been previously linked in *E.*  
418 *faecium*. We identified a non-synonymous substitution in *phoU*, a negative regulator of the *pst*  
419 operon, in a chlorhexidine-adapted *E. faecium* 1,231,410 derivative that had reduced  
420 chlorhexidine and daptomycin susceptibilities and decreased intracellular Pi levels (23).

421

422 We quantified the levels of intracellular inorganic phosphate (Pi) in the wild-type strain and in  
423 SE101 under routine culture conditions. However, the levels were not significantly different for  
424 any time point assayed (Fig. S3).

425

426 To investigate the function of the *pstB* mutation further, we deleted the complete *pst* transport  
427 system (EFTG\_01170-74) in SE101 and in the *E. faecium* 1,231,410 wild-type. The growth

428 observed in the presence of vancomycin and H-CHG for the SE101 $\Delta$ *pst* deletion mutant was  
429 significantly different as compared to SE101 (Fig. 4B and D; *P*-value < 0.05 using one-tailed  
430 Student's *t* test). Specifically, unlike SE101, the OD<sub>600</sub> values did not increase for the  
431 SE101 $\Delta$ *pst* deletion mutant after 3 h in the presence of vancomycin and H-CHG. Conversely,  
432 deletion of the *pst* transport system from the wild-type strain did not substantially alter OD<sub>600</sub>  
433 values in response vancomycin and H-CHG (Fig. 4A and C). We conclude that the *pstB*  
434 mutation in SE101 confers protection from killing by vancomycin and H-CHG co-treatment by an  
435 as yet undetermined mechanism, allowing cells to grow in the presence of the two drugs (Fig.  
436 4B).

437

438 **Conclusions and perspective.** We previously reported that *E. faecium* 1,231,410 exhibits  
439 increased susceptibility to vancomycin in the presence of chlorhexidine (19). The goal of the  
440 current study was to identify molecular contributors to this phenotype. The long-term goal is to  
441 use this information to identify less toxic compounds that could be compounded with  
442 vancomycin to exploit this vulnerability. That said, products incorporating chlorhexidine with  
443 antibiotics have been previously reported. Synergism between vancomycin and chlorhexidine  
444 was previously reported in methicillin-resistant *Staphylococcus aureus*, where chitosan-based  
445 sponges were utilized for localized delivery of these two synergistic compounds that inhibited *S.*  
446 *aureus* growth for 21 days (50). Another study exploited synergism between chlorhexidine and  
447  $\beta$ -lactam antibiotics and synthesized hybrid organic salts (GUMBOS), which were effective  
448 against clinical isolates of Gram-positive and Gram-negative bacteria (51).

449

450 In our previous report, we proposed three models that are not mutually exclusive that could  
451 explain this phenotype. The models are reiterated here. Model 1 is that altered Pbp levels in the  
452 presence of chlorhexidine prevent D-Ala-D-Lac precursors from being cross-linked. Model 2  
453 proposes that the chlorhexidine stress response alters substrate pools for peptidoglycan

454 synthesis, resulting in vancomycin-sensitive termini that are neither D-Ala-D-Ala nor D-Ala-D-  
455 Lac. Finally, model 3 is that post-translational regulation of VanX and/or VanY prevents  
456 depletion of D-Ala-D-Ala termini from peptidoglycan precursors in the presence of chlorhexidine,  
457 thereby causing cells to be sensitive to vancomycin. In terms of Model 2, the results of the D-  
458 lactate amendment study (Table 3) indicate that D-Ala-D-Lac termini (and therefore, induction of  
459 the vancomycin resistance genes) are required for the synergy phenotype. Model 3 is not  
460 supported by our observation that *vanY<sub>A</sub>* deletion has no impact on the synergy phenotype (Fig.  
461 S1), but *vanX<sub>A</sub>* remains to be investigated, and therefore this model has not been fully  
462 assessed.

463

464 Growth analyses of *E. faecium* deletion mutants provide some support for Model 1. Upon *ddcP*  
465 deletion, which is predicted to result in increased availability of pentapeptide precursors for  
466 cross-linking, *E. faecium* 1,231,410 cells maintained susceptibility to the synergistic action of  
467 vancomycin and chlorhexidine, but the cells did not lyse. These results suggest that *ddcP*  
468 contributes to weakening of the cell wall in the presence of the two drugs. Our previously  
469 published transcriptomic study identified up to 5-fold induction of *ddcP* in *E. faecium* 1,231,410  
470 cultures treated with the MIC of H-CHG for 15 minutes, as compared to untreated cultures (19).  
471 It is possible that in the presence of H-CHG, DdcP actively trims the terminal D-Ala from  
472 peptidoglycan precursors and generates tetrapeptides. At the same time, in the presence of  
473 vancomycin, the combined activities of the vancomycin resistance genes result in pentapeptides  
474 terminating in D-Lac. The relative availability of penta- and tetrapeptides with chemically  
475 different termini likely impacts the overall efficiency of cross-linking and the strength of the cell  
476 wall. Since all Pbps do not have the same affinity for tetra- versus pentapeptides, unacceptable  
477 precursors for transpeptidation are synthesized in the presence of both vancomycin and  
478 chlorhexidine, and the cells lyse. However, complicating this explanation, we did not observe  
479 any difference in growth phenotype between the L,D transpeptidase (*ldt<sub>fm</sub>*) deletion mutant and

480 the wild-type in the presence of vancomycin and H-CHG (Fig. S1F and G). As reported  
481 previously, activity of Ldt<sub>fm</sub> is dependent on availability of tetrapeptides (42, 43). If (and how)  
482 Ldt<sub>fm</sub> activity changes in the presence of vancomycin and H-CHG remains to be elucidated. A  
483 critical set of future experiments that are relevant to both Models 1 and 2 will be to analyze  
484 cytoplasmic peptidoglycan precursor pools and mature peptidoglycan structures in *E. faecium*  
485 wild-type and *ddcP* mutant cultures exposed to vancomycin and chlorhexidine. This analysis  
486 would allow us to analyze the relative balance of tetra- versus pentapeptide termini, as well as  
487 their chemical compositions. Moreover, more detailed assessments of cell viability and structure  
488 would also be useful, including live/dead staining and electron microscopy.

489

490 We also found that synergy escaper mutants (i.e., cells that failed to lyse) arose after 24 h of  
491 exposure to both vancomycin and chlorhexidine. A spontaneous non-synonymous substitution  
492 in *pstB* conferred a survival advantage in the presence of the two antimicrobials. However, the  
493 exact mechanism(s) of how the Pst system impacts antimicrobial susceptibility in *E. faecium* is  
494 unknown. Critical experiments for the future are to analyze Pi levels under stressed conditions  
495 (i.e., in the presence of vancomycin and chlorhexidine), and to perform analysis of cytoplasmic  
496 peptidoglycan precursor pools and mature peptidoglycan structures, as described above.

497

498 Overall, our study highlights the complexity of the enterococcal cell wall stress response in  
499 response to combination antimicrobial therapy and identifies a novel contributor (*pstB*) to this  
500 response. We additionally present a collection of deletion mutants, validated by genome  
501 sequencing, that are of use for future studies of *E. faecium* cell wall biology.

502

### 503 **Acknowledgements**

504

505 This work was supported by start-up funds from the University of Texas at Dallas and the Cecil

506 H. and Ida Green Chair in Systems Biology Science to K.L.P. We are grateful to Dr. Breck  
507 Duerkop for providing the plasmid pLT06-*tet*.

508

509

## 510 **References**

- 511 1. Agudelo Higueta NI, Huycke MM. 2014. Enterococcal Disease, Epidemiology, and  
512 Implications for Treatment. In: Gilmore MS, Clewell DB, Ike Y, Shankar N, editors. Enterococci:  
513 From Commensals to Leading Causes of Drug Resistant Infection. Boston.
- 514 2. Lebreton F, Manson AL, Saavedra JT, Straub TJ, Earl AM, Gilmore MS. Tracing the  
515 Enterococci from Paleozoic Origins to the Hospital. *Cell*. 2017;169(5):849-61 e13.
- 516 3. Reynolds PE. Structure, biochemistry and mechanism of action of glycopeptide  
517 antibiotics. *European Journal of Clinical Microbiology & Infectious Diseases*. 1989;8(11):943-50.
- 518 4. Courvalin P. Vancomycin resistance in gram-positive cocci. *Clinical Infectious Diseases*.  
519 2006;42 Suppl 1:S25-34.
- 520 5. Handwerger S, Pucci MJ, Volk KJ, Liu J, Lee MS. The cytoplasmic peptidoglycan  
521 precursor of vancomycin-resistant *Enterococcus faecalis* terminates in lactate. *Journal of*  
522 *Bacteriology*. 1992;174(18):5982-4.
- 523 6. Allen NE, Hobbs JN, Jr., Richardson JM, Riggan RM. Biosynthesis of modified  
524 peptidoglycan precursors by vancomycin-resistant *Enterococcus faecium*. *FEMS Microbiology*  
525 *Letters*. 1992;77(1-3):109-15.
- 526 7. Messer J, Reynolds PE. Modified peptidoglycan precursors produced by glycopeptide-  
527 resistant enterococci. *FEMS Microbiology Letters*. 1992;73(1-2):195-200.
- 528 8. Liu J, Volk KJ, Lee MS, Pucci M, Handwerger S. Binding studies of vancomycin to the  
529 cytoplasmic peptidoglycan precursors by affinity capillary electrophoresis. *Analytical Chemistry*.  
530 1994;66(14):2412-6.

- 531 9. Leclercq R, Derlot E, Duval J, Courvalin P. Plasmid-mediated resistance to vancomycin  
532 and teicoplanin in *Enterococcus faecium*. The New England Journal of Medicine.  
533 1988;319(3):157-61.
- 534 10. Woodford N. Glycopeptide-resistant enterococci: a decade of experience. Journal of  
535 Medical Microbiology. 1998;47(10):849-62.
- 536 11. Munoz-Price LS, Hota B, Stemer A, Weinstein RA. Prevention of bloodstream infections  
537 by use of daily chlorhexidine baths for patients at a long-term acute care hospital. Infection  
538 Control and Hospital Epidemiology. 2009;30(11):1031-5.
- 539 12. Muto CA, Jernigan JA, Ostrowsky BE, Richet HM, Jarvis WR, Boyce JM, et al. SHEA  
540 guideline for preventing nosocomial transmission of multidrug-resistant strains of  
541 *Staphylococcus aureus* and *Enterococcus*. Infection Control and Hospital Epidemiology.  
542 2003;24(5):362-86.
- 543 13. LeDell K, Muto CA, Jarvis WR, Farr BM. SHEA guideline for preventing nosocomial  
544 transmission of multidrug-resistant strains of *Staphylococcus aureus* and *Enterococcus*.  
545 Infection Control and Hospital Epidemiology. 2003;24(9):639-41.
- 546 14. Komljenovic I, Marquardt D, Harroun TA, Sternin E. Location of chlorhexidine in DMPC  
547 model membranes: a neutron diffraction study. Chemistry and Physics of Lipids.  
548 2010;163(6):480-7.
- 549 15. Koontongkaew S, Jitpukdeebodindra S. Interaction of chlorhexidine with cytoplasmic  
550 membranes of *Streptococcus mutans* GS-5. Caries Research. 1995;29(5):413-7.
- 551 16. Hugo WB, Longworth AR. Some Aspects of the Mode of Action of Chlorhexidine. The  
552 Journal of Pharmacy and Pharmacology. 1964;16:655-62.
- 553 17. Hugo WB, Longworth AR. Cytological Aspects of the Mode of Action of Chlorhexidine  
554 Diacetate. The Journal of Pharmacy and Pharmacology. 1965;17:28-32.

- 555 18. Hugo WB, Longworth AR. The effect of chlorhexidine on the electrophoretic mobility,  
556 cytoplasmic constituents, dehydrogenase activity and cell walls of *Escherichia coli* and  
557 *Staphylococcus aureus*. *The Journal of Pharmacy and Pharmacology*. 1966;18(9):569-78.
- 558 19. Bhardwaj P, Ziegler E, Palmer KL. Chlorhexidine Induces VanA-Type Vancomycin  
559 Resistance Genes in Enterococci. *Antimicrobial Agents and Chemotherapy*. 2016;60(4):2209-21
- 560 20. Palmer KL, Godfrey P, Griggs A, Kos VN, Zucker J, Desjardins C, et al. Comparative  
561 genomics of enterococci: variation in *Enterococcus faecalis*, clade structure in *E. faecium*, and  
562 defining characteristics of *E. gallinarum* and *E. casseliflavus*. *MBio*. 2012;3(1):e00318-11.
- 563 21. Adams HM, Li X, Mascio C, Chesnel L, Palmer KL. Mutations associated with reduced  
564 surotomycin susceptibility in *Clostridium difficile* and *Enterococcus* species. *Antimicrobial*  
565 *Agents and Chemotherapy*. 2015;59(7):4139-47.
- 566 22. Thurlow LR, Thomas VC, Hancock LE. Capsular polysaccharide production in  
567 *Enterococcus faecalis* and contribution of CpsF to capsule serospecificity. *Journal of*  
568 *Bacteriology*. 2009;191(20):6203-10.
- 569 23. Bhardwaj P, Hans A, Ruikar K, Guan Z, Palmer KL. Reduced Chlorhexidine and  
570 Daptomycin Susceptibility in Vancomycin-Resistant *Enterococcus faecium* after Serial  
571 Chlorhexidine Exposure. *Antimicrobial Agents and Chemotherapy*. 2018;62(1).
- 572 24. Mechler L, Herbig A, Paprotka K, Fraunholz M, Nieselt K, Bertram R. A novel point  
573 mutation promotes growth phase-dependent daptomycin tolerance in *Staphylococcus aureus*.  
574 *Antimicrobial Agents and Chemotherapy*. 2015;59(9):5366-76.
- 575 25. Zarlenga LJ, Gilmore MS, Sahm DF. Effects of amino acids on expression of  
576 enterococcal vancomycin resistance. *Antimicrobial Agents and Chemotherapy*. 1992;36(4):902-  
577 5.
- 578 26. van der Aart LT, Lemmens N, van Wamel WJ, van Wezel GP. Substrate Inhibition of  
579 VanA by d-Alanine Reduces Vancomycin Resistance in a VanX-Dependent Manner.  
580 *Antimicrobial Agents and Chemotherapy*. 2016;60(8):4930-9.



- 581 27. Hancock LE, Murray BE, Sillanpaa J. 2014. Enterococcal Cell Wall Components and  
582 Structures. In: Gilmore MS, Clewell DB, Ike Y, Shankar N, editors. Enterococci: From  
583 Commensals to Leading Causes of Drug Resistant Infection. Boston.
- 584 28. Coyette J, Hancock L. Enterococcal Cell Wall. In: Gilmore MS, editor. The Enterococci:  
585 Pathogenesis, Molecular Biology, and Antibiotic Resistance. Washington, D.C.: ASM Press;  
586 2002. p. 385-408.
- 587 29. Ghuyssen JM. Use of bacteriolytic enzymes in determination of wall structure and their  
588 role in cell metabolism. *Bacteriol Rev.* 1968;32(4 Pt 2):425-64.
- 589 30. Schleifer KH, Kandler O. Peptidoglycan types of bacterial cell walls and their taxonomic  
590 implications. *Bacteriol Rev.* 1972;36(4):407-77.
- 591 31. Navarre WW, Schneewind O. Surface proteins of gram-positive bacteria and  
592 mechanisms of their targeting to the cell wall envelope. *Microbiology and Molecular Biology*  
593 *Reviews.* 1999;63(1):174-229.
- 594 32. Vollmer W, Blanot D, de Pedro MA. Peptidoglycan structure and architecture. *FEMS*  
595 *Microbiology Reviews.* 2008;32(2):149-67.
- 596 33. van Heijenoort J. Assembly of the monomer unit of bacterial peptidoglycan. *Cellular and*  
597 *Molecular Life Sciences.* 1998;54(4):300-4.
- 598 34. Anderson JS, Matsushashi M, Haskin MA, Strominger JL. Lipid-Phosphoacetyl-muramyl-  
599 Pentapeptide and Lipid-Phosphodisaccharide-Pentapeptide: Presumed Membrane Transport  
600 Intermediates in Cell Wall Synthesis. *Proceedings of the National Academy of Sciences of the*  
601 *United States of America.* 1965;53:881-9.
- 602 35. Anderson JS, Strominger JL. Isolation and utilization of phospholipid intermediates in  
603 cell wall glycopeptide synthesis. *Biochemical and Biophysical Research Communications.*  
604 1965;21(5):516-21.

- 605 36. van Dam V, Sijbrandi R, Kol M, Swiezewska E, de Kruijff B, Breukink E. Transmembrane  
606 transport of peptidoglycan precursors across model and bacterial membranes. *Mol Microbiol.*  
607 2007;64(4):1105-14.
- 608 37. van Heijenoort J. Formation of the glycan chains in the synthesis of bacterial  
609 peptidoglycan. *Glycobiology.* 2001;11(3):25R-36R.
- 610 38. Scheffers DJ, Pinho MG. Bacterial cell wall synthesis: new insights from localization  
611 studies. *Microbiology and Molecular Biology Reviews.* 2005;69(4):585-607.
- 612 39. Rice LB, Carias LL, Rudin S, Hutton R, Marshall S, Hassan M, et al. Role of class A  
613 penicillin-binding proteins in the expression of beta-lactam resistance in *Enterococcus faecium*.  
614 *Journal of Bacteriology.* 2009;191(11):3649-56.
- 615 40. Ghuysen JM. Serine beta-lactamases and penicillin-binding proteins. *Annual Review of*  
616 *Microbiology.* 1991;45:37-67.
- 617 41. Goffin C, Ghuysen JM. Multimodular penicillin-binding proteins: an enigmatic family of  
618 orthologs and paralogs. *Microbiology and Molecular Biology Reviews.* 1998;62(4):1079-93.
- 619 42. Mainardi JL, Fourgeaud M, Hugonnet JE, Dubost L, Brouard JP, Ouazzani J, et al. A  
620 novel peptidoglycan cross-linking enzyme for a beta-lactam-resistant transpeptidation pathway.  
621 *The Journal of Biological Chemistry.* 2005;280(46):38146-52.
- 622 43. Mainardi JL, Morel V, Fourgeaud M, Cremniter J, Blanot D, Legrand R, et al. Balance  
623 between two transpeptidation mechanisms determines the expression of beta-lactam resistance  
624 in *Enterococcus faecium*. *The Journal of Biological Chemistry.* 2002;277(39):35801-7.
- 625 44. Mainardi JL, Legrand R, Arthur M, Schoot B, van Heijenoort J, Gutmann L. Novel  
626 mechanism of beta-lactam resistance due to bypass of DD-transpeptidation in *Enterococcus*  
627 *faecium*. *The Journal of Biological Chemistry.* 2000;275(22):16490-6.
- 628 45. Kristich CJ, Djoric D, Little JL. Genetic basis for vancomycin-enhanced cephalosporin  
629 susceptibility in vancomycin-resistant enterococci revealed using counterselection with

- 630 dominant-negative thymidylate synthase. *Antimicrobial Agents and Chemotherapy*.  
631 2014;58(3):1556-64.
- 632 46. Nicas TI, Wu CY, Hobbs JN, Jr., Preston DA, Allen NE. Characterization of vancomycin  
633 resistance in *Enterococcus faecium* and *Enterococcus faecalis*. *Antimicrobial Agents and*  
634 *Chemotherapy*. 1989;33(7):1121-4.
- 635 47. Williamson R, Al-Obeid S, Shlaes JH, Goldstein FW, Shlaes DM. Inducible resistance to  
636 vancomycin in *Enterococcus faecium* D366. *The Journal of Infectious Diseases*.  
637 1989;159(6):1095-104.
- 638 48. Rice P, Longden I, Bleasby A. EMBOSS: the European Molecular Biology Open  
639 Software Suite. *Trends Genet*. 2000;16(6):276-7.
- 640 49. Chan FY, Torriani A. PstB protein of the phosphate-specific transport system of  
641 *Escherichia coli* is an ATPase. *Journal of Bacteriology*. 1996;178(13):3974-7.
- 642 50. Smith JK, Moshref AR, Jennings JA, Courtney HS, Haggard WO. Chitosan sponges for  
643 local synergistic infection therapy: a pilot study. *Clin Orthop Relat Res*. 2013;471(10):3158-64.
- 644 51. Cole MR, Hobden JA, Warner IM. Recycling antibiotics into GUMBOS: a new  
645 combination strategy to combat multi-drug-resistant bacteria. *Molecules*. 2015;20(4):6466-87.

646  
647

## 648 **Supplemental Figures and Tables**

649

650 **Figure S1. Representative optical density (OD<sub>600</sub>) of (A) *E. faecium* 410 wild-type, (B)**  
651 ***ΔpbpZ*, (C) *ΔvanY*, (D) *ΔponA*, (E) *ΔddcP ΔvanY*, (F) *Δldt<sub>fm</sub>*, (G) *ΔddcP Δldt<sub>fm</sub>*, (H) *ΔpbpF*,**  
652 **and (I) *ΔpbpA* after vancomycin and chlorhexidine treatment. *E. faecium* was cultured at**  
653 **37°C in BHI broth until the OD<sub>600</sub> reached 0.6 as described in the materials and methods. Equal**  
654 **volumes of culture were split into BHI containing 0X (control; red circles) or vancomycin and**  
655 **chlorhexidine (Van and H-CHG; blue squares). OD<sub>600</sub> values were monitored for 6 h. Error bars**

656 indicate standard deviations from three independent experiments.

657

658 **Figure S2. A  $\Delta ddcP$  mutant dies but does not lyse in the presence of vancomycin and H-**  
659 **CHG.** Optical density ( $OD_{600nm}$ ) (A) and CFU/mL (B) of *E. faecium* 1,231,410 wild-type (*E.*  
660 *faecium* 410) and the *ddcP* deletion mutant with (“treated”) and without (“control”) vancomycin  
661 and H-CHG treatment. *E. faecium* was cultured in BHI broth until the  $OD_{600}$  reached 0.6, as  
662 described in materials and methods. Equal volumes of cultures were split into BHI or BHI  
663 containing vancomycin (50  $\mu\text{g/ml}$ ) and H-CHG (4.9  $\mu\text{g/ml}$ ).  $OD_{600}$  values and CFU/mL were  
664 monitored for 3 h. Error bars indicate standard deviations from n=3 independent experiments.  
665 Significance was assessed using the one-tailed Student’s *t*-test. \* denotes *P*-value < 0.05. Stars  
666 indicate significant differences between vancomycin- and H-CHG-treated cultures.

667

668 **Figure S3. Quantification of intracellular organic phosphate (Pi) levels in *E. faecium***  
669 **1,231,410 wild-type and SE101 synergy escaper mutant.** Intracellular Pi levels were  
670 measured for both strains at different growth time points ( $OD_{600}$  0.4-1.0) as described in  
671 materials and methods. The levels (pmoles) were normalized using CFU count. Standard  
672 deviation was calculated from n=5 independent experiments and significance value was  
673 calculated using one-tailed Student’s *t* test. Time points: 1,  $OD_{600}$  0.4-0.5; 2,  $OD_{600}$  0.6-0.7; 3,  
674  $OD_{600}$  0.7-0.8; 4,  $OD_{600}$  0.8-0.9;  $OD_{600}$  1.0-1.5.

675

676 **Table S1. List of primers used in the study.**

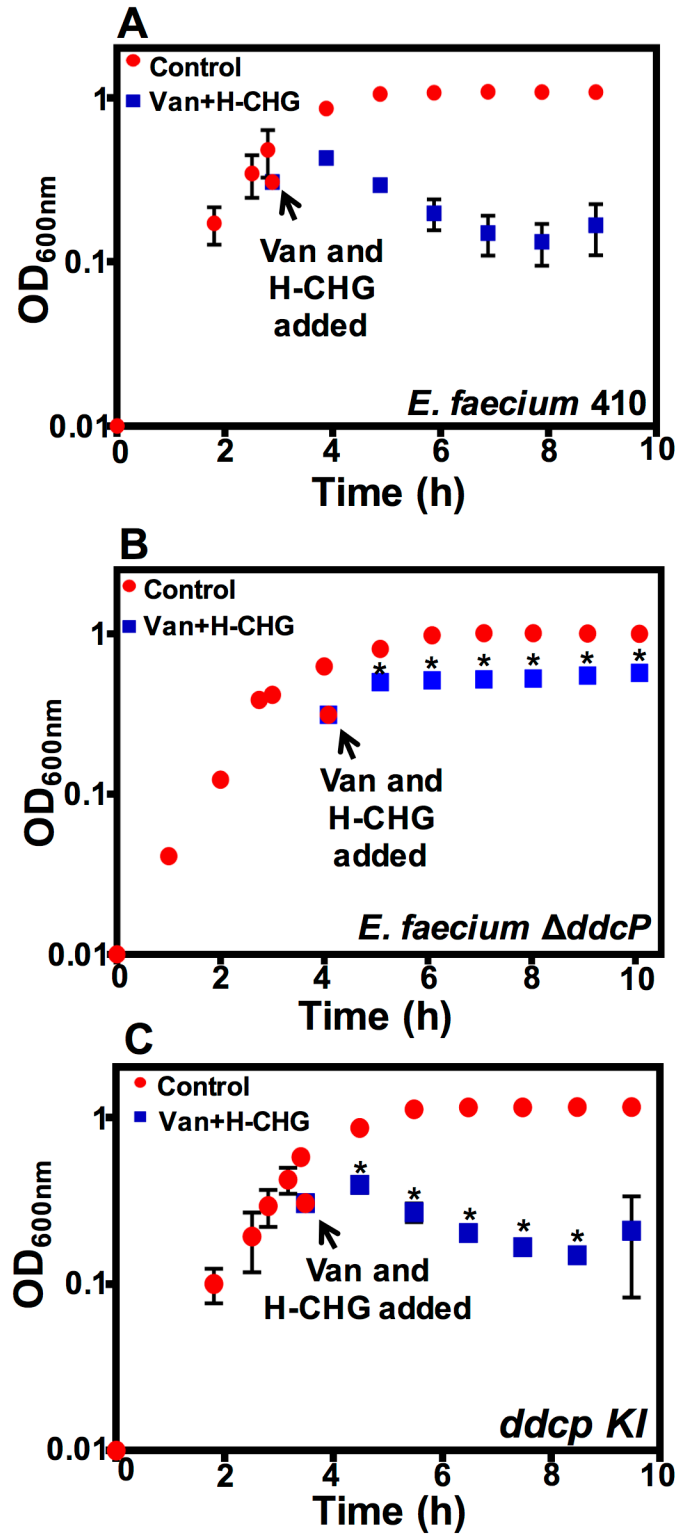

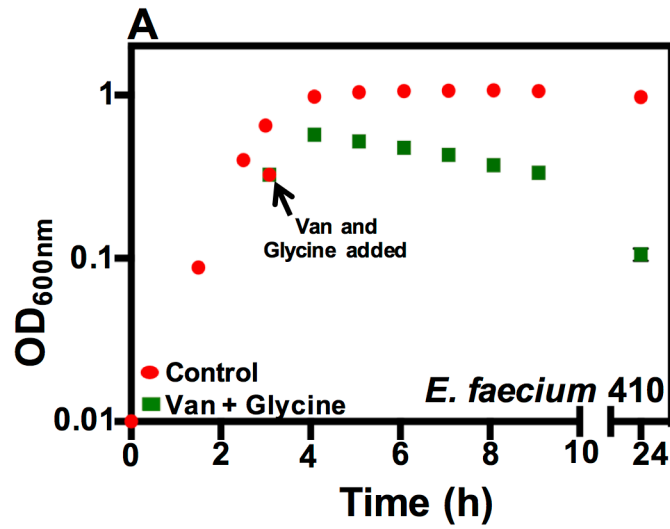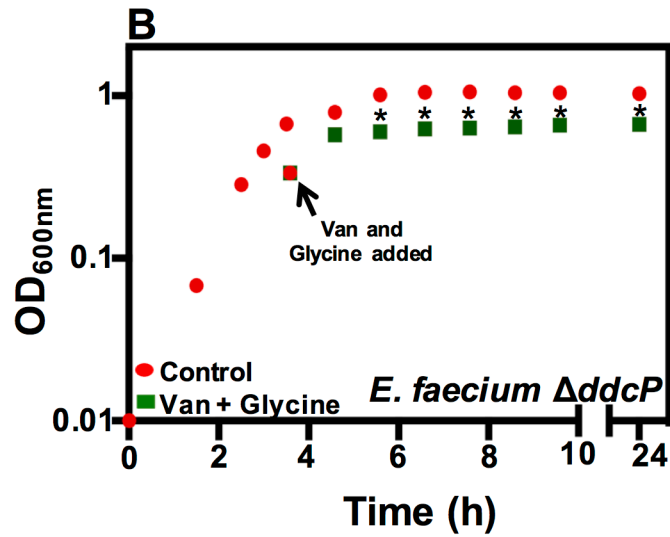

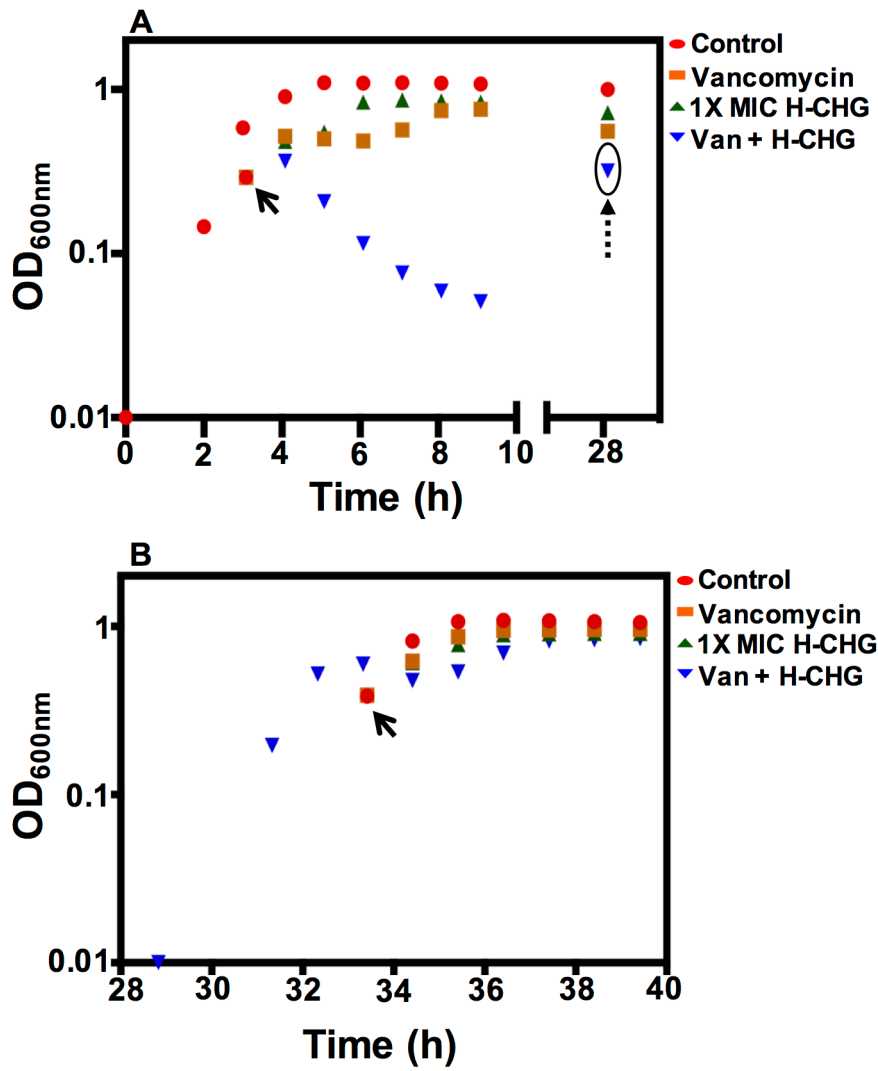

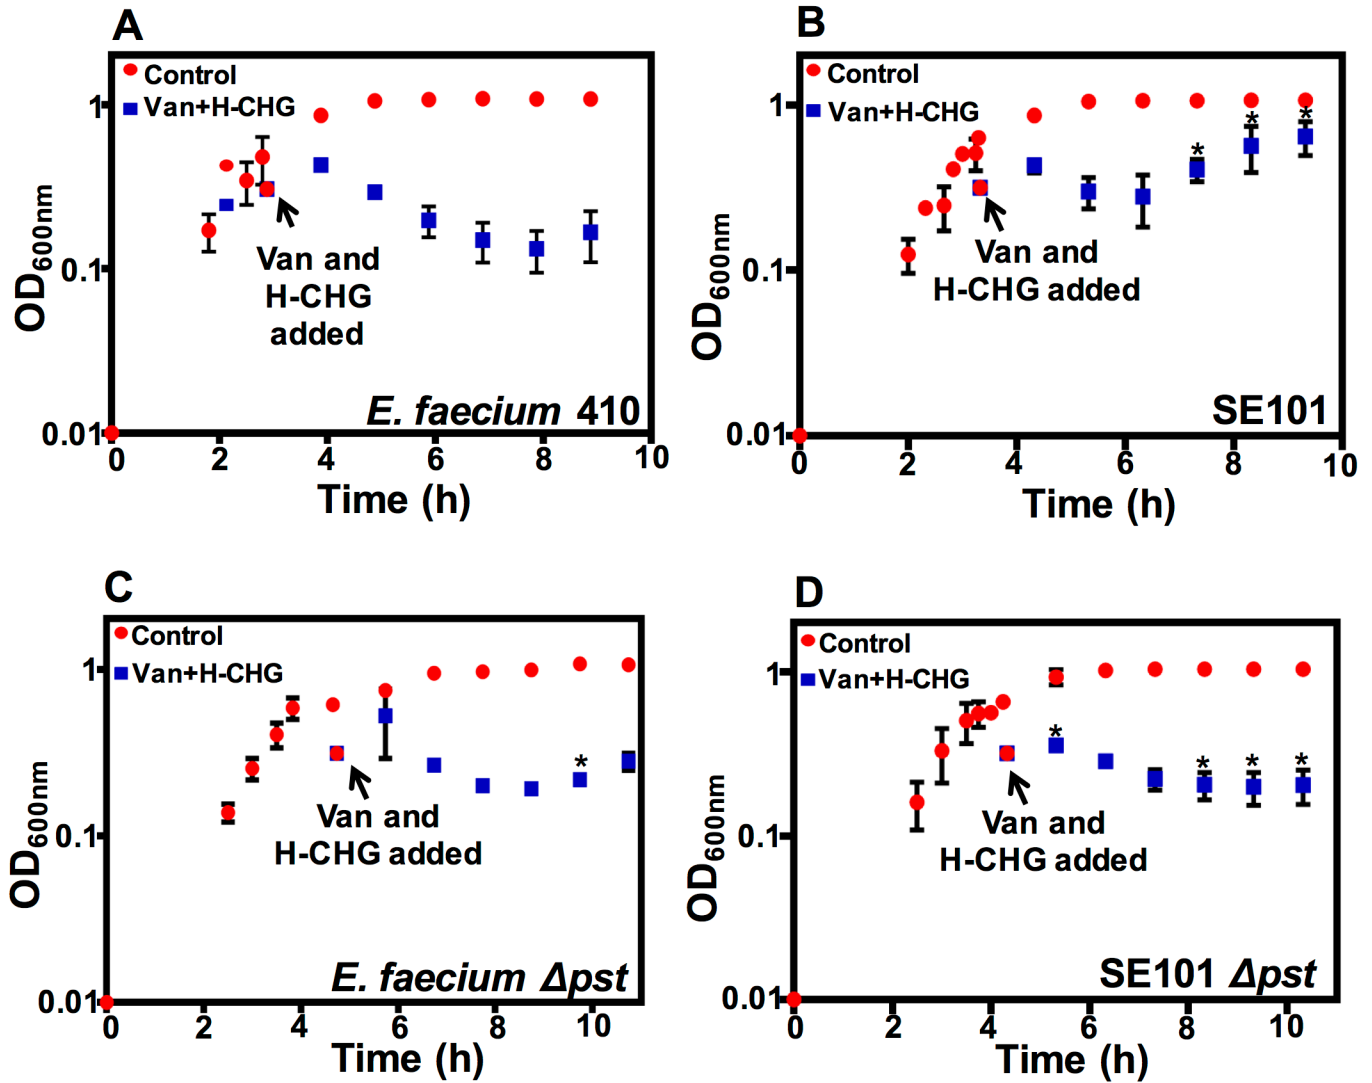



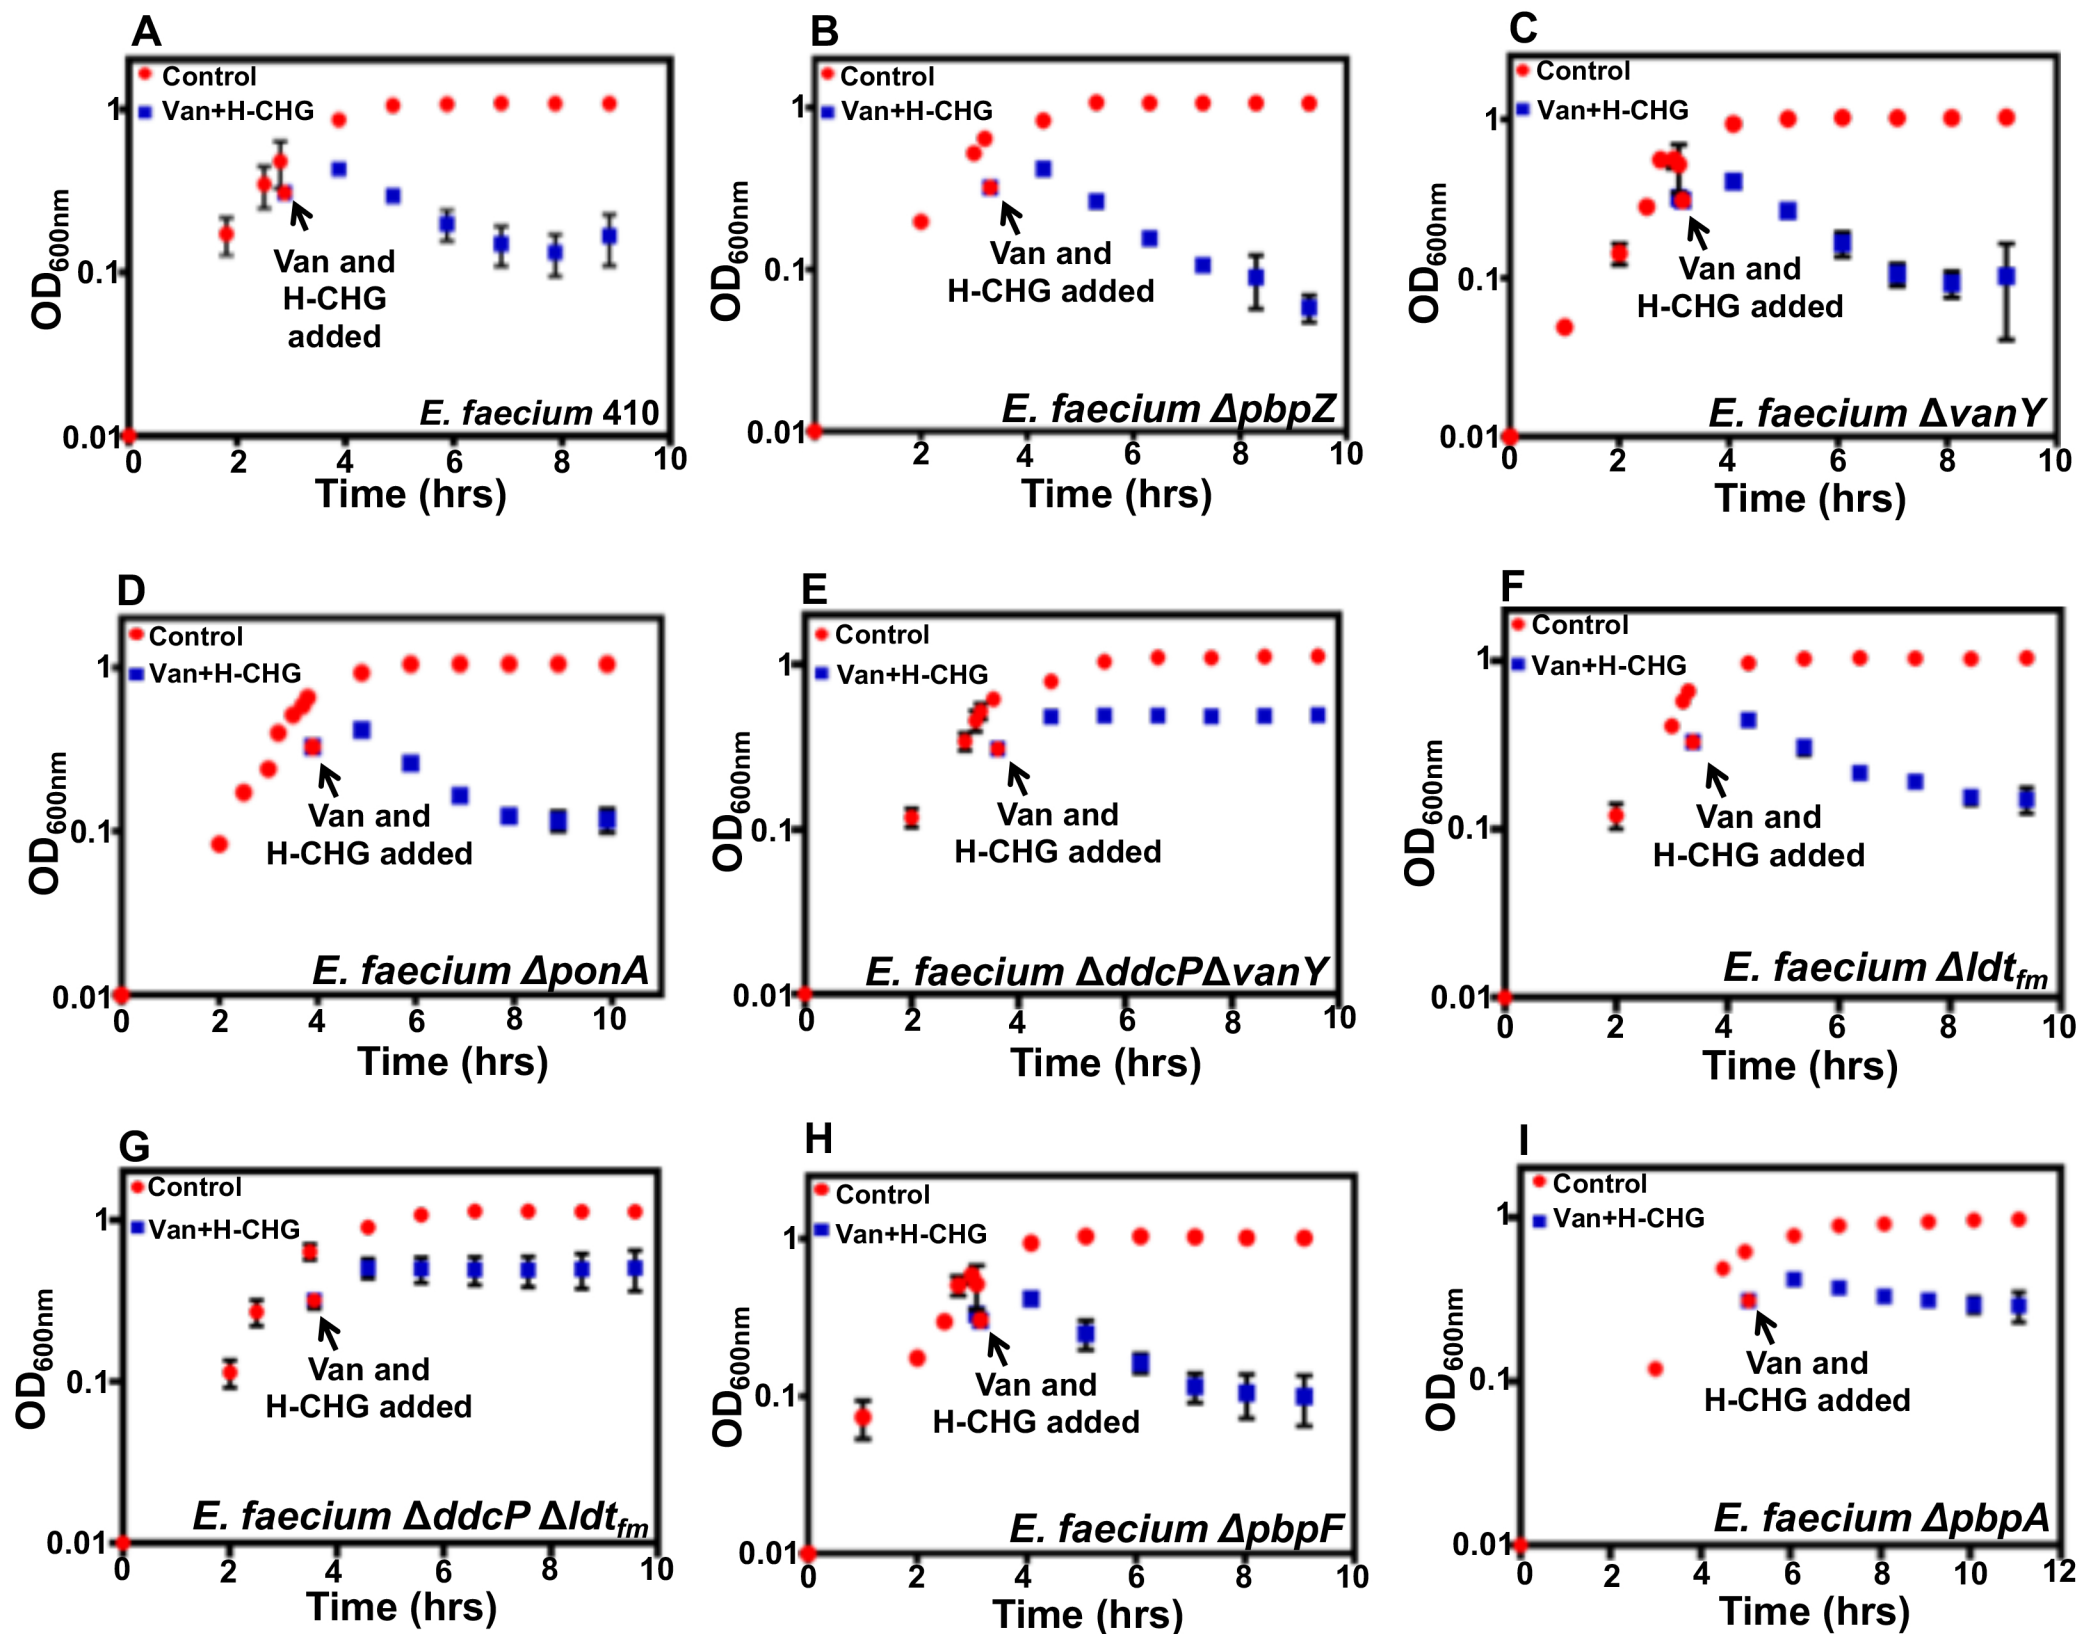

Figure S1. Representative optical density ( $OD_{600nm}$ ) of (A) *E. faecium* 410 wild-type, (B)  $\Delta pbpZ$ , (C)  $\Delta vanY$ , (D)  $\Delta ponA$ , (E)  $\Delta ddcP \Delta vanY$ , (F)  $\Delta ldt_{fm}$ , (G)  $\Delta ddcP \Delta ldt_{fm}$ , (H)  $\Delta pbpF$ , and (I)  $\Delta pbpA$  after vancomycin and chlorhexidine treatment. *E. faecium* culture was grown at 37°C in BHI until  $OD_{600nm}$  reached 0.6 as described in materials and methods. Equal volumes of cultures were split into BHI containing 0X (control; red circles) or vancomycin and chlorhexidine (Van and H-CHG; blue squares).  $OD_{600nm}$  values were monitored for 6 hr. Error bars indicate standard deviations from n=3 independent experiments.

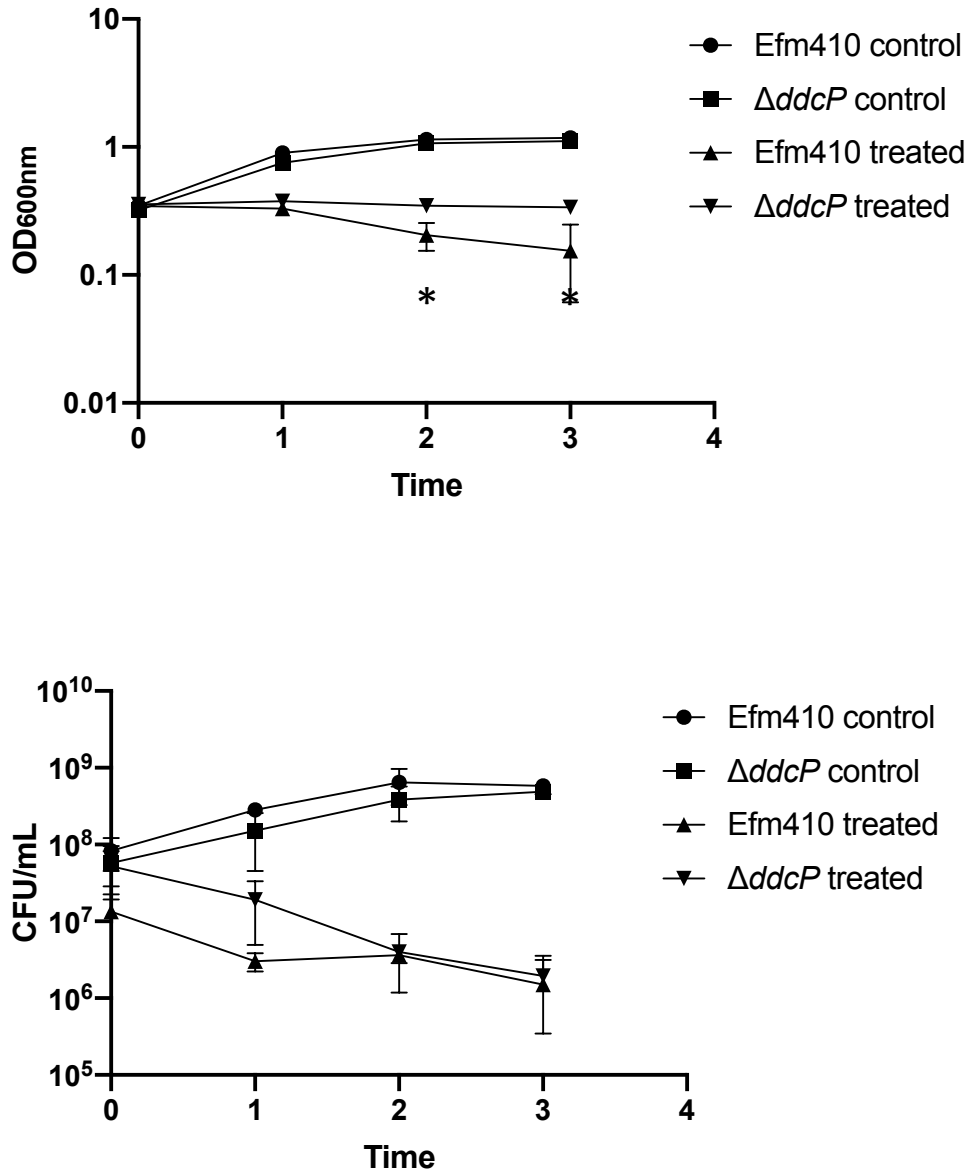

**Figure S2. A  $\Delta ddcP$  mutant dies but does not lyse in the presence of vancomycin and H-CHG.** Optical density (OD<sub>600nm</sub>) (A) and CFU/mL (B) of *E. faecium* 1,231,410 wild-type (*E. faecium* 410) and the *ddcP* deletion mutant with (“treated”) and without (“control”) vancomycin and H-CHG treatment. *E. faecium* was cultured in BHI broth until the OD<sub>600</sub> reached 0.6, as described in materials and methods. Equal volumes of cultures were split into BHI or BHI containing vancomycin (50  $\mu$ g/ml) and H-CHG (4.9  $\mu$ g/ml). OD<sub>600</sub> values and CFU/mL were monitored for 3 h. Error bars indicate standard deviations from n=3 independent experiments. Significance was assessed using the one-tailed Student’s *t*-test. \* denotes *P*-value < 0.05. Stars indicate significant differences between vancomycin- and H-CHG-treated cultures.

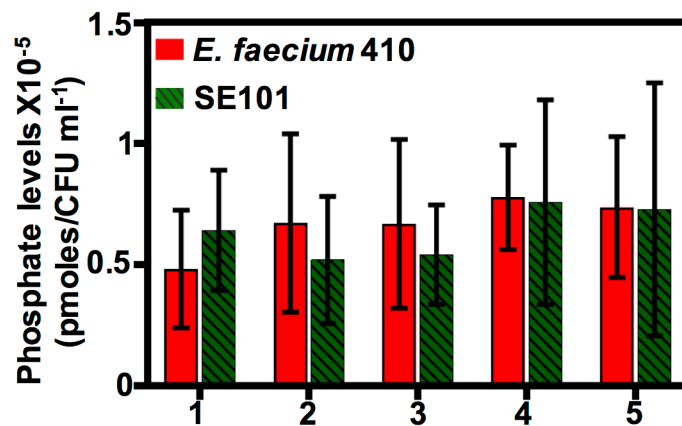

**Figure S2. Quantification of intracellular organic phosphate (Pi) levels in *E. faecium* 410 wild-type and SE101 synergy escaper mutant.** Intracellular Pi levels were measured for both strains at different growth time points ( $OD_{600}$  0.4-1.0) as described in materials and methods. The levels (pmoles) were normalized using CFU count. Standard deviation was calculated from  $n=5$  independent experiments and significance value was calculated using one-tailed Student's  $t$  test. Time points: 1,  $OD_{600}$  0.4-0.5; 2,  $OD_{600}$  0.6-0.7; 3,  $OD_{600}$  0.7-0.8; 4,  $OD_{600}$  0.8-0.9; 5,  $OD_{600}$  1.0-1.5.

**Table S1. Primers used in the study**

| <b><u>Primer name</u></b>            | <b><u>Sequence</u></b>                          |
|--------------------------------------|-------------------------------------------------|
| <b><u>pbpF deletion</u></b>          |                                                 |
| <i>pbpF</i> flanking Arm1_BamHI For  | ATGCAT <b>GGATCC</b> ATGGAGCATCAGTCGTTTCAGCTGT  |
| <i>pbpF</i> flanking Arm1_Sph1 Rev   | ATGCAT <b>GCATGCA</b> AAATCCATTTGCTTCTTCTCCTG   |
| <i>pbpF</i> flanking Arm2_Sph1 For   | ATGCAT <b>GCATGCG</b> GAGAGTAGCCCCCTTTGAAAACGA  |
| <i>pbpF</i> flanking Arm2_BamHI Rev  | ATGCAT <b>GGATCC</b> GGCAACAAGCTGTCTGGTGGCCAA   |
| <i>pbpF</i> screening For            | GCAGGAAGAAAACACTCTTTCCT                         |
| <i>pbpF</i> screening Rev            | CGTTTCGATTTGATTCGCGCT                           |
| <b><u>ddcP deletion</u></b>          |                                                 |
| <i>ddcP</i> flanking Arm1_EcoRI For  | ATGCAT <b>GAATTC</b> CGCCACCTGTCAGTTCAGATCCCA   |
| <i>ddcP</i> flanking Arm1_Sph1 Rev   | ATGCAT <b>GCATGCT</b> TATGGACATATCCGATCTCCTTGT  |
| <i>ddcP</i> flanking Arm2_Sph1 For   | ATGCAT <b>GCATGCT</b> TTGTTTTAATTGAACAAAAAGAAA  |
| <i>ddcP</i> flanking Arm2_EcoRI Rev  | ATGCAT <b>GAATTC</b> TTGTTCCATGGCATATTGTTTCAT   |
| <i>ddcP</i> screening For            | AAACGACCGCTAACCTTCCA                            |
| <i>ddcP</i> screening Rev            | CGCAAACGTCCATGTACTGC                            |
| <b><u>vanY deletion</u></b>          |                                                 |
| <i>vanY</i> flanking Arm1_BamHI For  | ATGCAT <b>GGATCC</b> CCTAAATATGCCACTTGGGATA     |
| <i>vanY</i> flanking Arm1_Sph1 Rev   | ATGCAT <b>GCATGCT</b> CTTCTTCATTTTCAGTCTCCT     |
| <i>vanY</i> flanking Arm2_Sph1 For   | ATGCAT <b>GCATGCG</b> AGGAGGTAAGGATGGCGGAAT     |
| <i>vanY</i> flanking Arm2_BamHI Rev  | ATGCAT <b>GGATCC</b> GTAGTTTATTACTCTTTAGCG      |
| <i>pbpF</i> screening For            | AGCTTGTACCAATGGGGAGC                            |
| <i>pbpF</i> screening Rev            | TCAGTCCAAGAAAGCCTCCA                            |
| <b><u>ldtfm deletion</u></b>         |                                                 |
| <i>ldtfm</i> flanking Arm1_BamHI For | ATGCAT <b>GGATCC</b> TGTCTCACGCTTTGGCATTTA      |
| <i>ldtfm</i> flanking Arm1_Sph1 Rev  | ATGCAT <b>GCATGCT</b> CTTGTTCATATCGACAACCTCC    |
| <i>ldtfm</i> flanking Arm2_Sph1 For  | ATGCAT <b>GCATGCG</b> TCTTCTAACAAAAATAAT        |
| <i>ldtfm</i> flanking Arm2_BamHI rev | ATGCAT <b>GGATCC</b> TGGACGAACACCTATGTTCCA      |
| <i>ldtfm</i> screening For           | TACATTGGTGCACCTGCTGT                            |
| <i>ldtfm</i> screening Rev           | GATGTATTAGAGGCGGGGGC                            |
| <b><u>ponA deletion</u></b>          |                                                 |
| <i>ponA</i> flanking Arm1_BamHI For  | ATGCAT <b>GGATCC</b> TTCCCTTCATTCCAGTTATTA      |
| <i>ponA</i> flanking Arm1_Xba1 Rev   | ATGCATT <b>CTAGA</b> AGTTTGTTCATTTGCCATTCT      |
| <i>ponA</i> flanking Arm2_Xba1 For   | ATGCATT <b>CTAGAG</b> CAAATGACCATACACCATCCAGC   |
| <i>ponA</i> flanking Arm2_BamHI rev  | ATGCAT <b>GGATCC</b> TTCTTTAATTGCAAATAAATGTAT   |
| <i>ponA</i> screening For            | GGGACGCCCAAAGGAAAAA                             |
| <i>ponA</i> screening Rev            | AGATCACACATGTATATGCTGGA                         |
| <b><u>pbpZ deletion</u></b>          |                                                 |
| <i>pbpZ</i> flanking Arm1_Xba1 For   | ATGCATT <b>CTAGAG</b> CGGTGTCGAATCCGATTGTTCCAA  |
| <i>pbpZ</i> flanking Arm1_Sph1 Rev   | ATGCAT <b>GCATGCA</b> AGGGTCACCTCACTAATGGTTT    |
| <i>pbpZ</i> flanking Arm2_Sph1 For   | ATGCAT <b>GCATGCG</b> ATGATTGATTTAATAGAATACAC   |
| <i>pbpZ</i> flanking Arm2_Xba1 Rev   | ATGCATT <b>CTAGAG</b> CTAAGCAAGTGGACGGCGTGATC   |
| <i>pbpZ</i> screening For            | CATGCTGACGTGTGAGCCTA                            |
| <i>pbpZ</i> screening Rev            | GCTGCATTTTGTTCACCACC                            |
| <b><u>pbpA deletion</u></b>          |                                                 |
| <i>pbpA</i> flanking Arm1_BamHI For  | ATGCAT <b>GGATCC</b> AAAAATCGGTTTTCAAAGTCT      |
| <i>pbpA</i> flanking Arm1_Sph1 Rev   | ATGCAT <b>GCATGCT</b> TTTTTTCATAAAATCTTTCAT     |
| <i>pbpA</i> flanking Arm2_Sph1 For   | ATGCAT <b>GCATGCG</b> CAAAATAAAAAAGAGGTCGTGAA   |
| <i>pbpA</i> flanking Arm2_BamHI1 Rev | ATGCAT <b>GGATCC</b> CACAATTTTTGTACACAACCTTTTTT |
| <i>pbpA</i> screening For            | GTAGTCGCATTAGCCGAGCT                            |

*pbpA* screening Rev

TCTCGGTATGAAGTCAAATTTAAGCA

**For tetracycline marker**

*tetL* For

[Phos]GACCGATGATGAAGAAAAGAATTTGAAAC

*tetL* Rev

[Phos]CTGTTATAAAAAAAGGATCAATTTTGAACCTCTC

*pbpA*-linear For

GCAAAAATAAAAAAGAGGTCGTGAA

*pbpA*-linear Rev

TTTTTTCATAAAATCTTTCAT

**ddcP complementation**

*ddcP* flanking Arm1\_EcoRI For

ATGCATGAATTCGCCACCTGTCAGTTCAGATCCCA

*ddcP* flanking Arm1\_EcoRI Rev

ATGCATGAATTCCTTGTCCATGGCATATTGTTTCAT

**pst transporter deletion**

*pst* flanking Arm1\_BamHI For

ATGCATGGATCCCCTTGCAAAACCGTTTTTTTGATGG

*pst* flanking Arm1\_Sph1 Rev

ATGCATGCATGCTAATTTAAGTTTTTTCATTAGAAA

*pst* flanking Arm2\_Sph1 For

ATGCATGCATGCTCAGGTCGATTTGGATAAGGAGGA

*pst* flanking Arm2\_BamHI Rev

ATGCATGGATCCTGAAGTAAGCACACAAATAAAAAA

*pst* screening For

TGTCCTTTTCTAACGGGGCC

*pst* screening Rev

CACGAACTGACTTGTGCACG

**Mutation confirmation**

Transporter EFTG\_01173 check for

GTGTTTCTGTTTCGGCTGGC

Transporter EFTG\_01173 check rev

TTGTCATGTTGAGGCCTCCG
